# Supplementary material for: The many faces of IKZF1 in B-cell precursor acute lymphoblastic leukemia
Source: PubMed Central journal article supplement — Haematologica. 2018 Mar 8;103(4):565–74. doi: 10.3324/haematol.2017.185603 (PMC5865415; doi:10.3324/haematol.2017.185603), 2018-04
Supplement: 2017_185603-Disclosures_and_Contributions.pdf [file 2017_185603-Disclosures_and_Contributions.pdf]

Haematologica  
HAEMATOL/2017/185603  
Version 3

The many faces of IKZF1 in B-cell precursor acute lymphoblastic  
leukemia

Rene Marke, Frank N. van Leeuwen, and Blanca Scheijen

Disclosures: None

Contributions: RM and BS wrote the manuscript, FNvL edited the manuscript.
