# Supplementary material for: The many faces of IKZF1 in B-cell precursor acute lymphoblastic leukemia
Source: PubMed Central journal article supplement — Haematologica. 2018 Mar 8;103(4):565–74. doi: 10.3324/haematol.2017.185603 (PMC5865415; doi:10.3324/haematol.2017.185603), 2018-04

**Transcription factor IKZF1 acts as a critical regulator of lymphoid differentiation and is frequently deleted or mutated in B-cell precursor acute lymphoblastic leukemia**

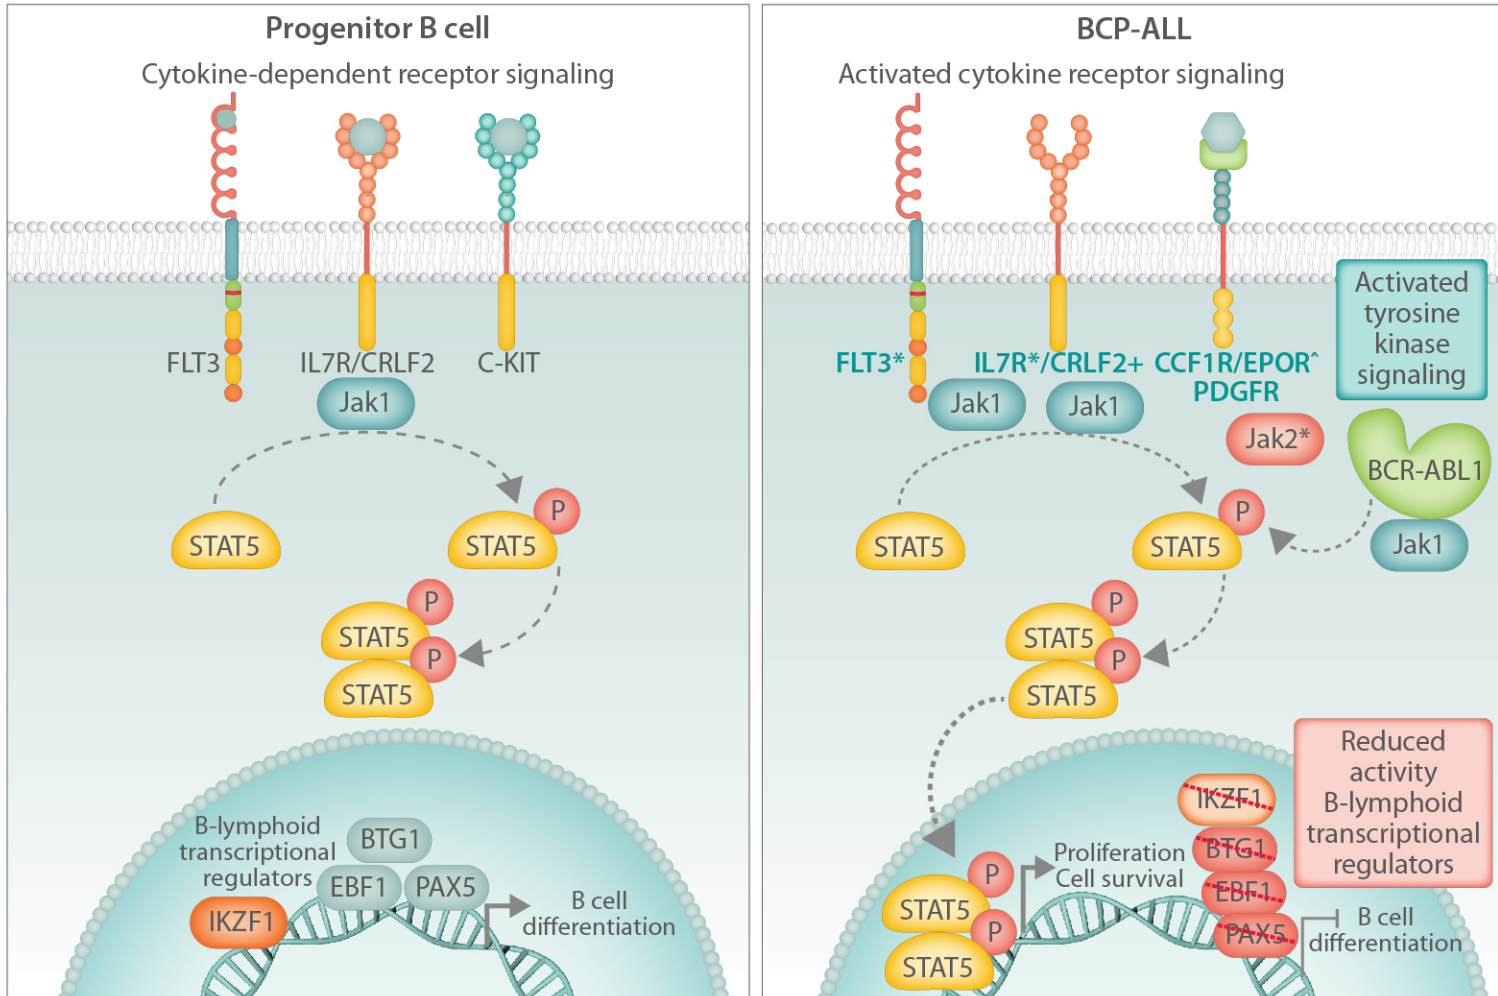

Supplement: HAEMATOL-2017-185603v3-Marke-01.pdf [file HAEMATOL-2017-185603v3-Marke-01.pdf]
